# Supplementary material for: Reliable plasmonic substrates for bioanalytical SERS applications easily prepared by convective assembly of gold nanocolloids
Source: Royal Society of Chemistry journal article supplement (doi:10.1039/c2an36440a), 2012-11-08
Supplement: c2an36440a.pdf [file c2an36440a.pdf]

## Electronic Supplementary Information

### Reliable plasmonic substrates for bio-analytical SERS applications easily prepared by convective assembly of gold nano-colloids

Cosmin Farcau, Monica Potara , Cosmin Leordean, Sanda Boca, and Simion Astilean

*Nanobiophotonics and Laser Microspectroscopy Center, Interdisciplinary Research in Bio-Nano-Sciences, and Faculty of Physics, Babes-Bolyai University, 42 Treboniu Laurian, 400271 Cluj-Napoca, Romania; E-mail: cosmin.farcau@phys.ubbcluj.ro, simion.astilean@phys.ubbcluj.ro*

The reproducibility of the SERS spectra of cytosine was tested by recording several spectra from different regions on the CSA substrate. As can be seen in Figure S1 a pretty good reproducibility was obtained with respect to band positions, full widths of Raman bands and peak/peak intensity ratios.

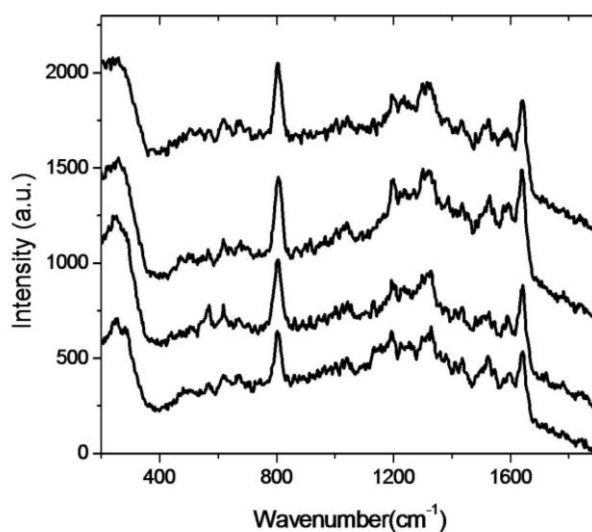

**Figure S1.** Selected SERS spectra of  $10^{-5}$  M cytosine collected from different spots on the surface of a CSA sample. The spectra were recorded using the 633 nm laser excitation line.
